# Supplementary material for: Twice as smart behavior of tert-butylthiacalix[4]arene derivative in glassy and crystalline form
Source: Royal Society of Chemistry journal article supplement (doi:10.1039/c5cp02042e), 2015-01-01
Supplement: c5cp02042e1.pdf [file c5cp02042e1.pdf]

## Electronic Supplementary Information

### Twice as smart behavior of tert-butylthiacalix[4]arene derivative in glassy and crystalline form

K. V. Gataullina,<sup>a</sup> M. A. Ziganshin,<sup>a</sup> I. I. Stoikov,<sup>a</sup> A. T. Gubaidullin<sup>b</sup> and V. V. Gorbatchuk<sup>\*a</sup>

---

<sup>a.</sup> *A.M. Butlerov Institute of Chemistry, Kazan Federal University, Kremlevskaya 18, 420008 Kazan, Russia. E-mail: Valery.Gorbatchuk@kpfu.ru*

<sup>b.</sup> *A.E. Arbuzov Institute of Organic and Physical Chemistry, Akad. Arbuzova, 8, 420088 Kazan, Russia.*

TG/DSC, DSC, TM-DSC and TG/DSC/MS curves for the studied calixarene samples in glassy and crystalline form and TG/DSC/MS curves for the products of their saturation with guest vapors and for metastable  $\beta_0$  polymorph formed after guest release; visual changes of glassy calixarene in this process and at the heating; molar enthalpies of fusion and  $\alpha \rightarrow \alpha'$  polymorphic transition

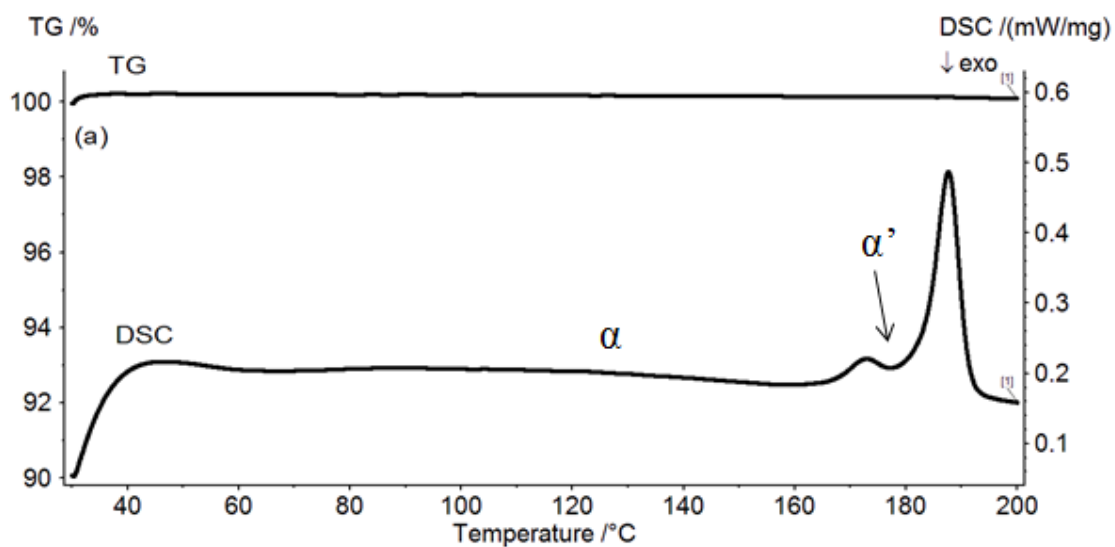

Figure 1S – TG/DSC curves for **1a** sample.

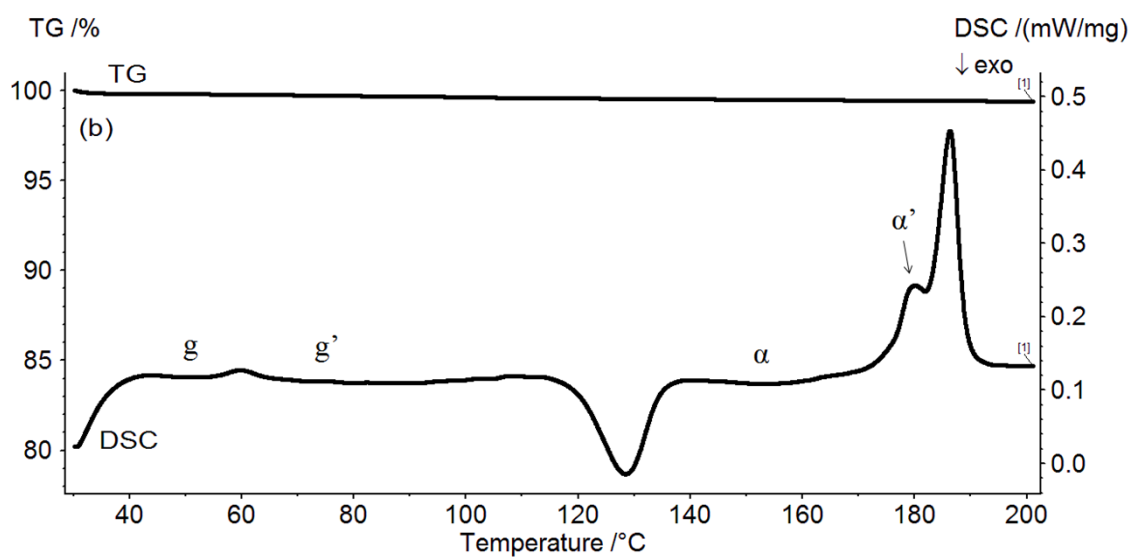

Figure 2S – TG/DSC curves for **1g** sample.

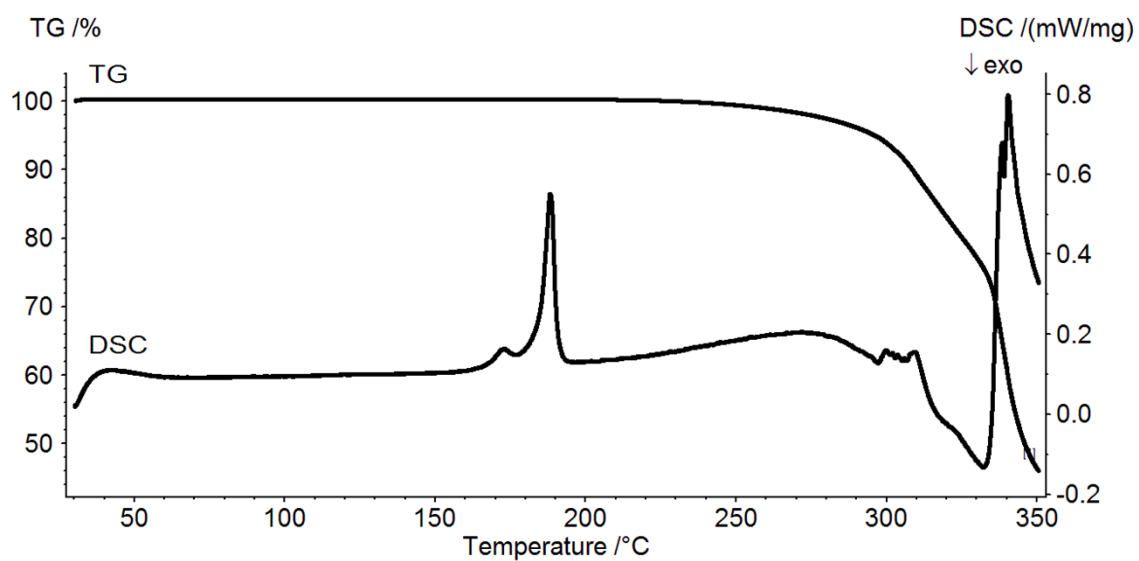

Figure 3S – TG/DSC curves for **1a** sample.

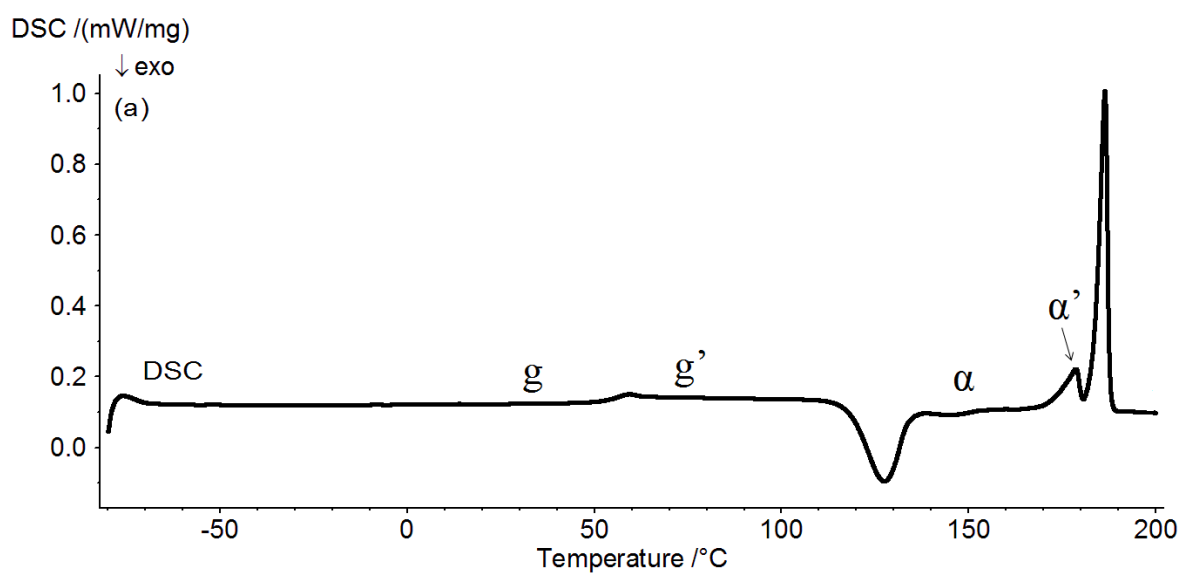

Figure 4S – DSC curves for **1g** sample. Heating rate is 5°C/min.

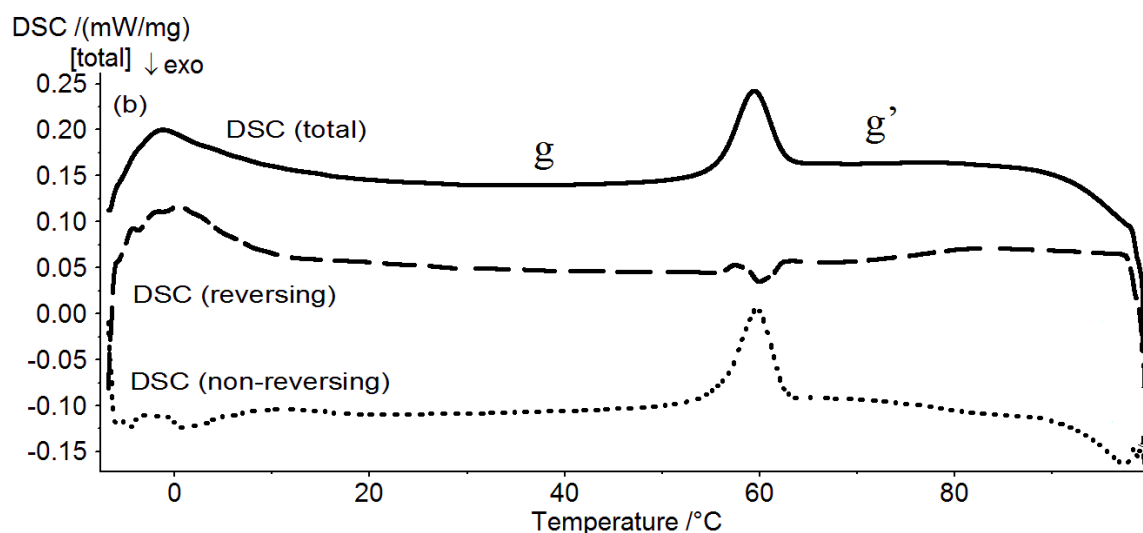

Figure 5S – TM-DSC curves for **1g** sample. Heating rate is 10°C/min.

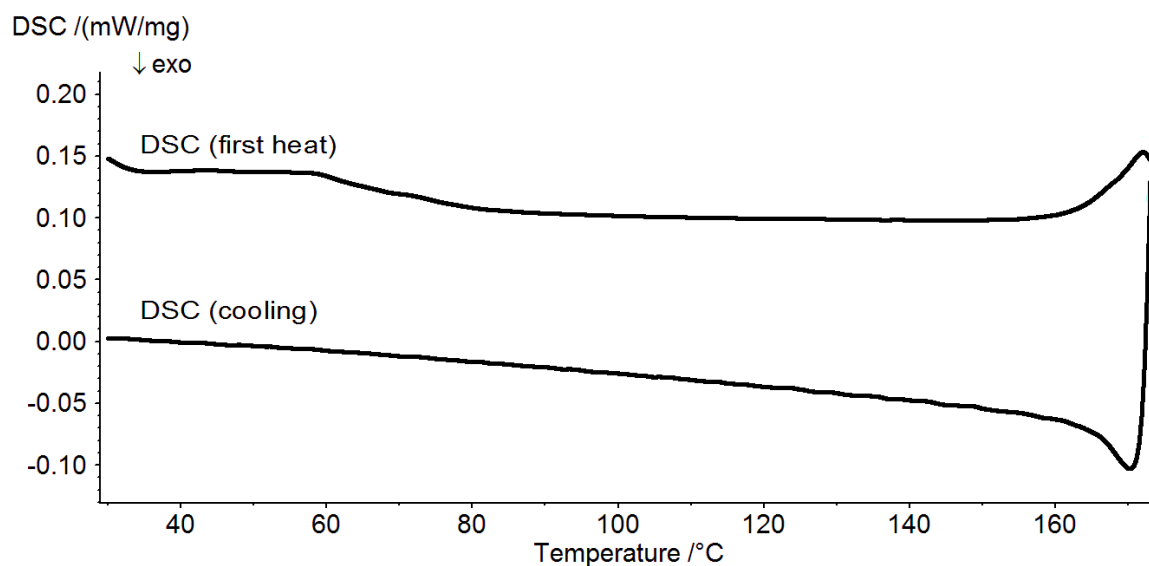

Figure 6S – DSC curves of **1g** heating to 173°C and cooling to 30°C with rate of 4 °C/min.

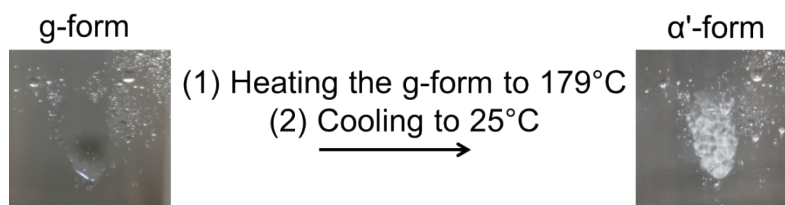

Figure 7S – Visual changes in **1g** sample at the heating to 179°C and cooling to RT of 25°C on the air.

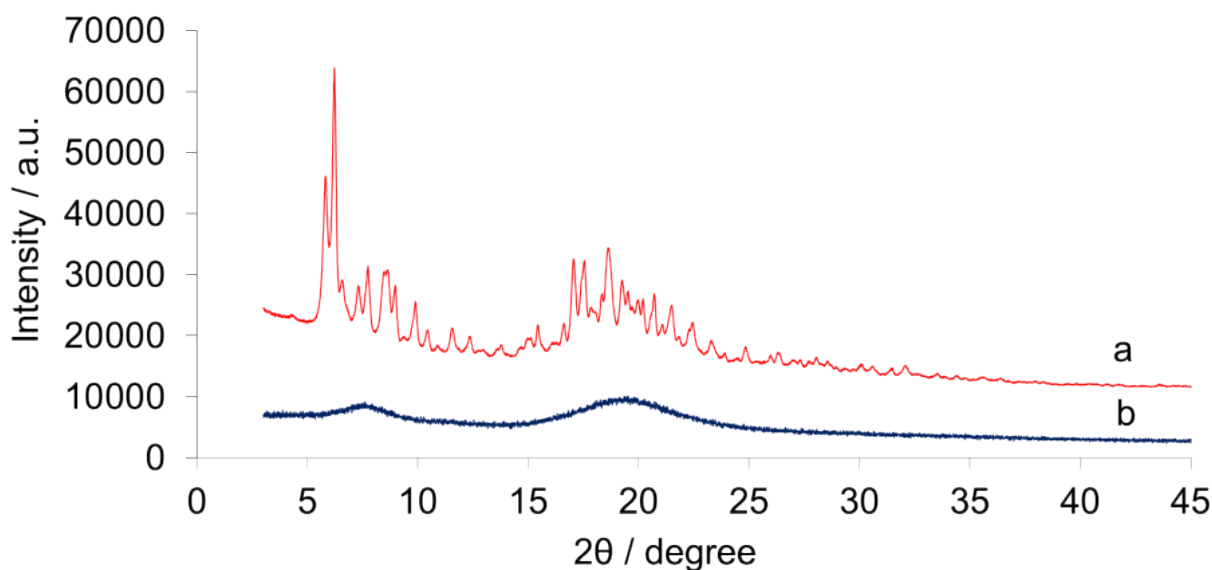

Figure 8S – XRPD data for **1a** prepared by heating of (a) **1g** to 150°C at the heating rate of 10°C/min and immediate cooling to RT on the air; (b) **1g** heated to 80°C and cooled to RT.

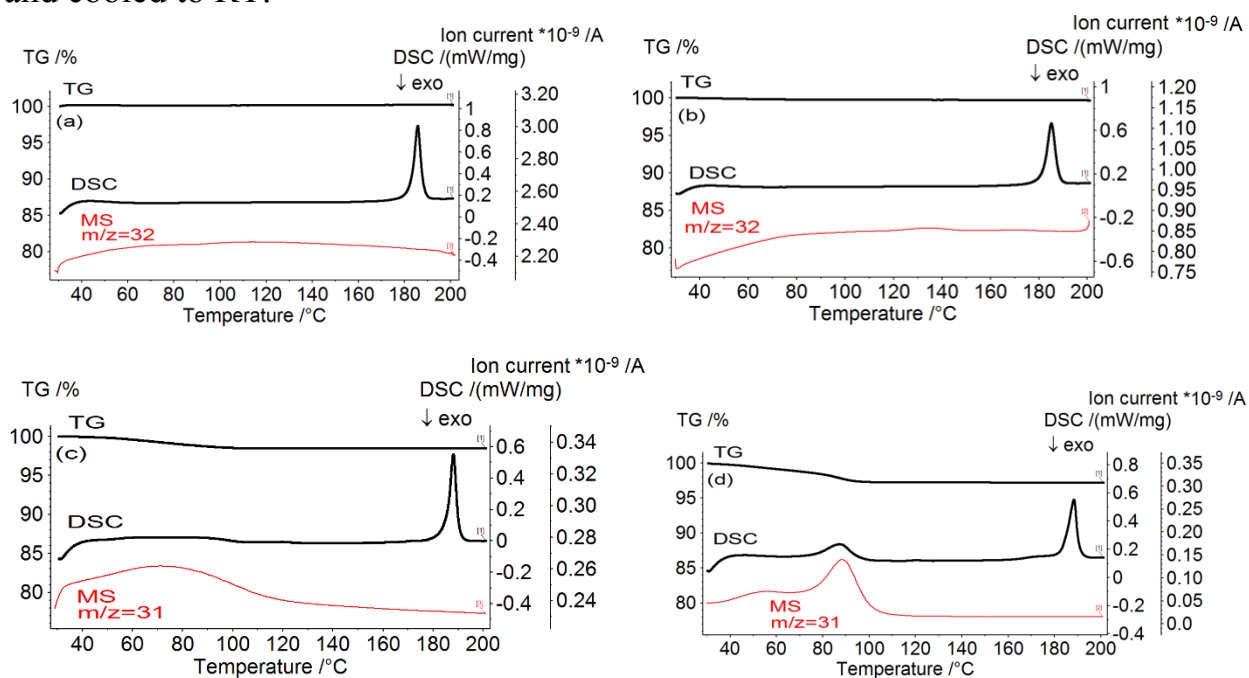

Figure 9S – TG/DSC/MS curves for products of solid calixarene **1** saturation with guest vapors at  $P/P_0 = 1$ ,  $T = 25^\circ\text{C}$ , in systems: (a) **1a** + MeOH, (b) **1g** + MeOH, (c) **1a** + EtOH, (d) **1g** + EtOH.

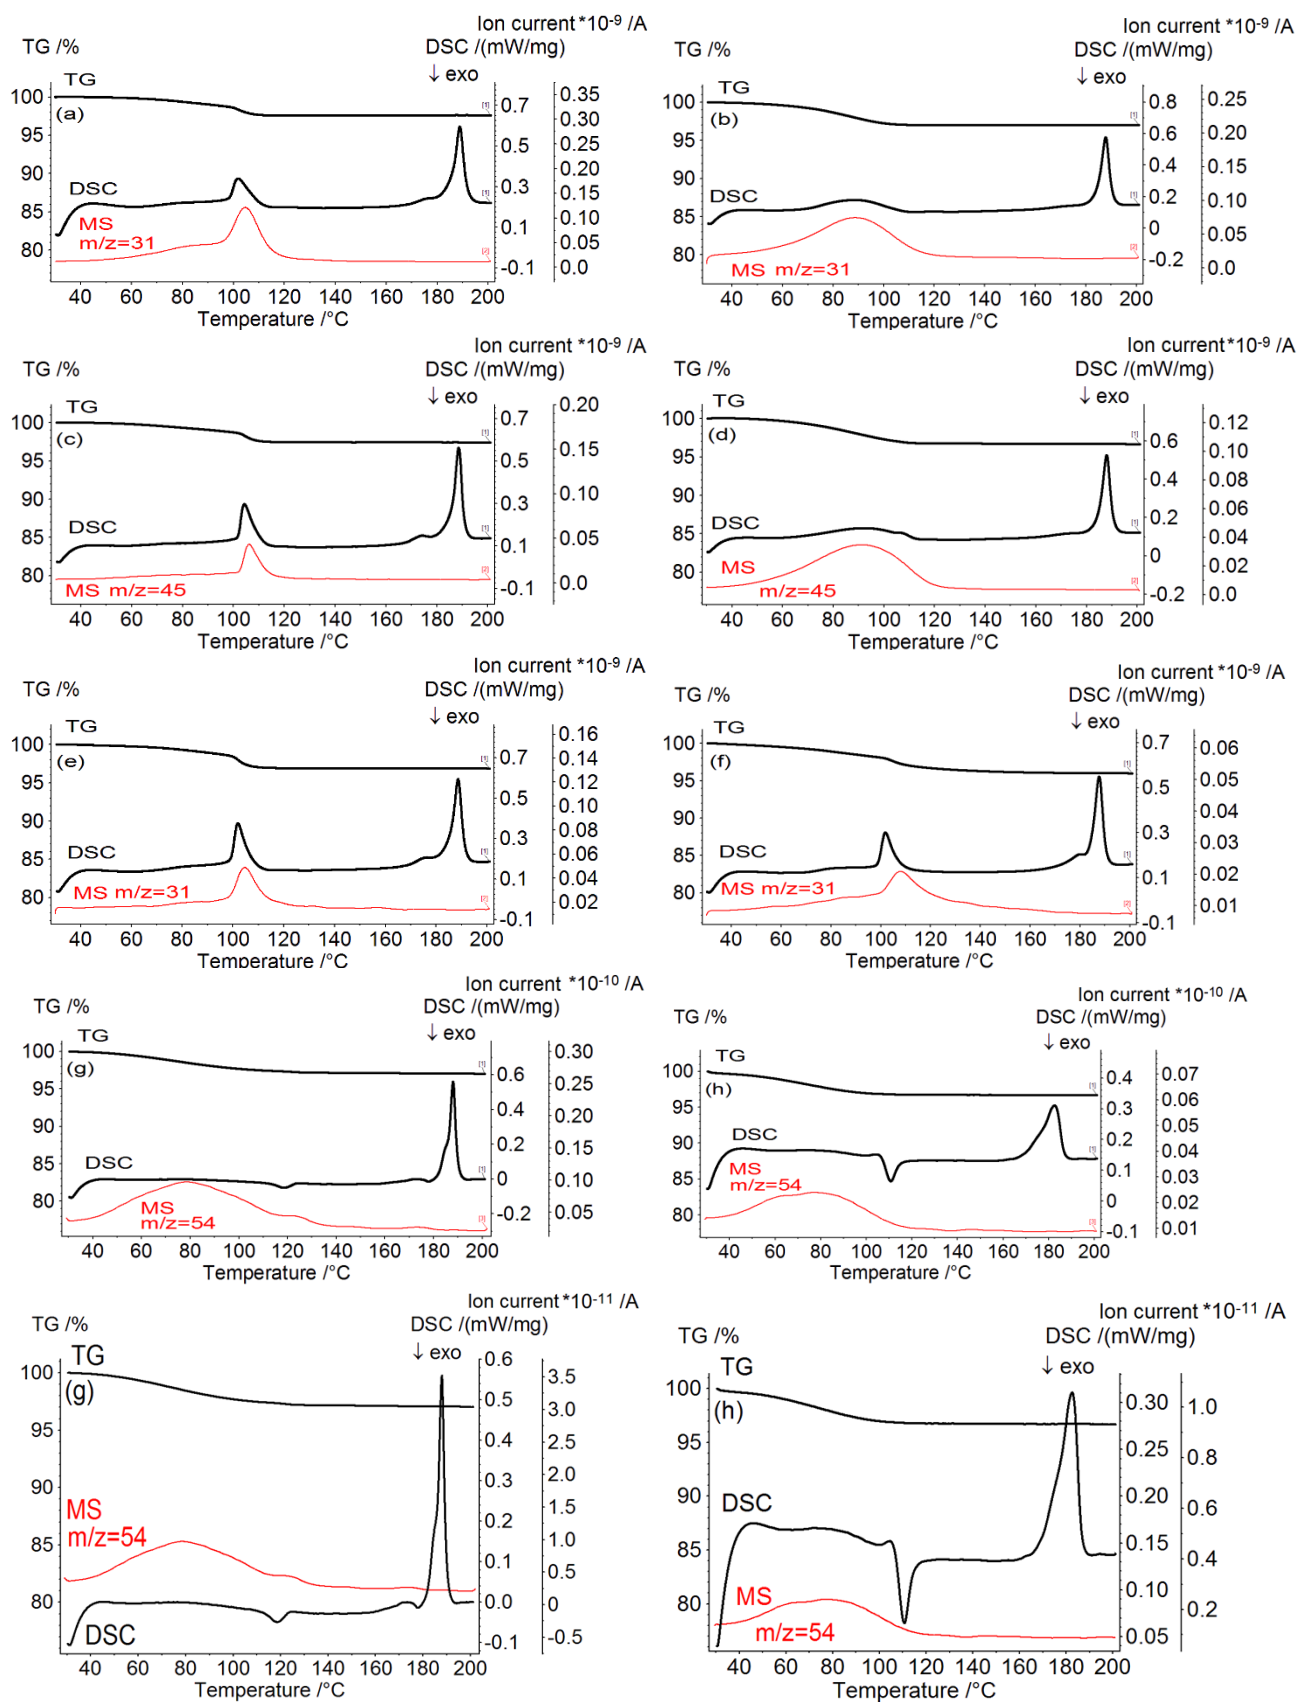

Figure 10S – TG/DSC/MS curves for products of solid calixarene **1** saturation with guest vapors at  $P/P_0 = 1$ ,  $T = 25^\circ\text{C}$ , in systems: (a) **1a** + n-PrOH, (b) **1g** + n-PrOH, (c) **1a** + i-PrOH, (d) **1g** + i-PrOH, (e) **1a** + n-BuOH, (f) **1g** + n-BuOH, (g) **1a** + EtCN, (h) **1g** + EtCN.

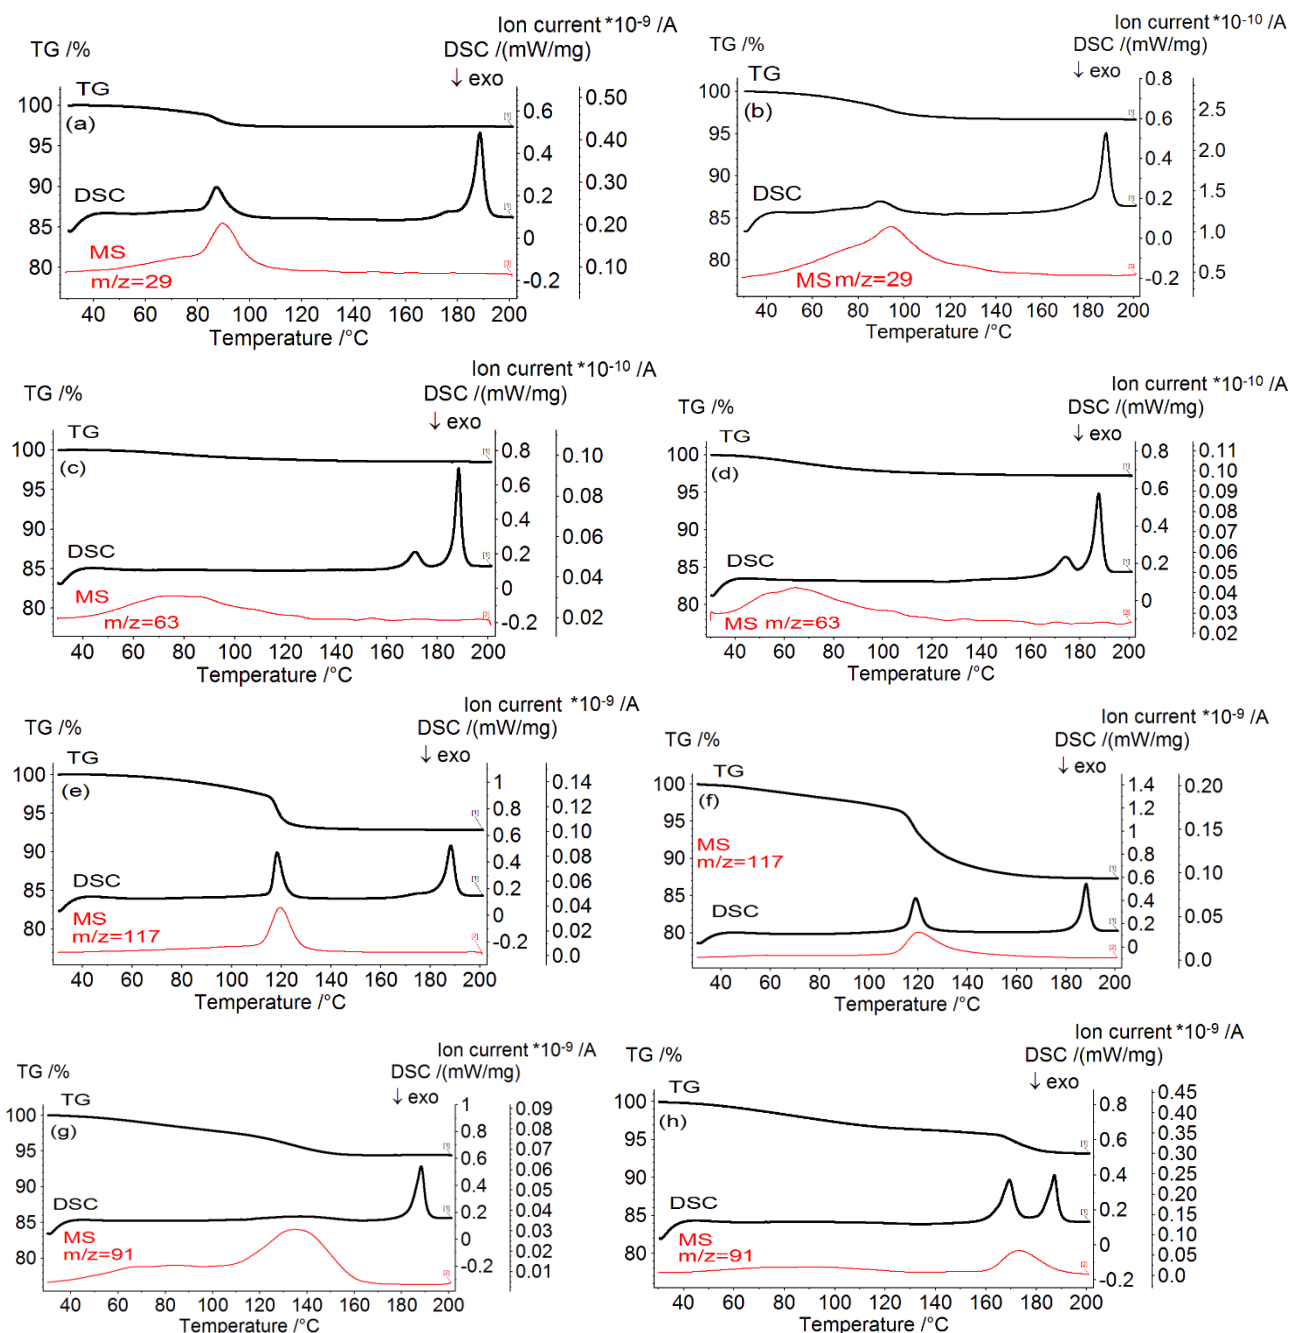

Figure 11S – TG/DSC/MS curves for products of solid calixarene **1** saturation with guest vapors at  $P/P_0 = 1$ ,  $T = 25^\circ\text{C}$ , in systems: (a) **1a** + PrCN, (b) **1g** + PrCN, (c) **1a** + C<sub>2</sub>H<sub>4</sub>Cl<sub>2</sub>, (d) **1g** + C<sub>2</sub>H<sub>4</sub>Cl<sub>2</sub>, (e) **1a** + CCl<sub>4</sub>, (f) **1g** + CCl<sub>4</sub>, (g) **1a** + C<sub>6</sub>H<sub>5</sub>Me, (h). **1g** + C<sub>6</sub>H<sub>5</sub>Me.

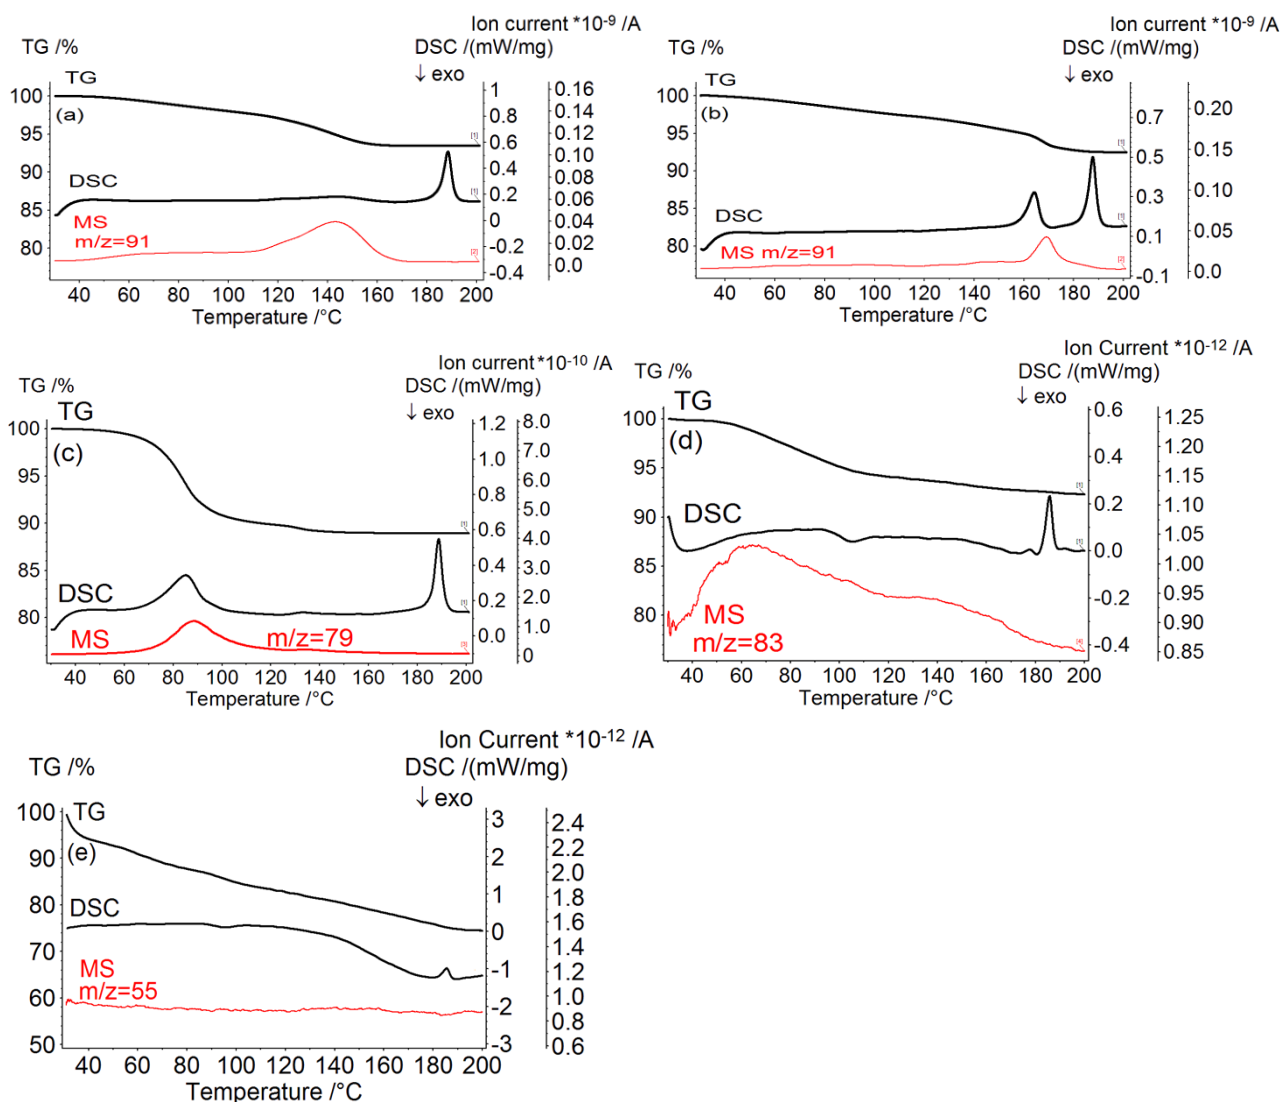

Figure 12S – TG/DSC/MS curves for products of solid calixarene **1** saturation with guest vapors at  $P/P_0 = 1$ ,  $T = 25^\circ\text{C}$ , in systems: (a) **1a** +  $\text{C}_6\text{H}_5\text{Et}$ , (b) **1g** +  $\text{C}_6\text{H}_5\text{Et}$ , (c) **1a** +  $\text{C}_5\text{H}_5\text{N}$ , (d) **1a** +  $\text{CHCl}_3$ , (e) **1a** + HFP.

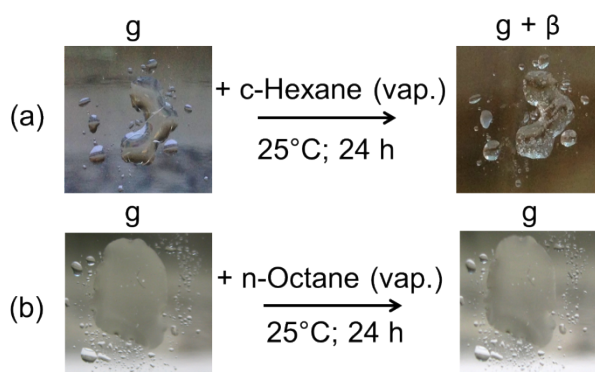

Figure 13S – Visual changes in **1g** sample at the saturation with vapors of (a) cyclohexane, (b) *n*-octane.



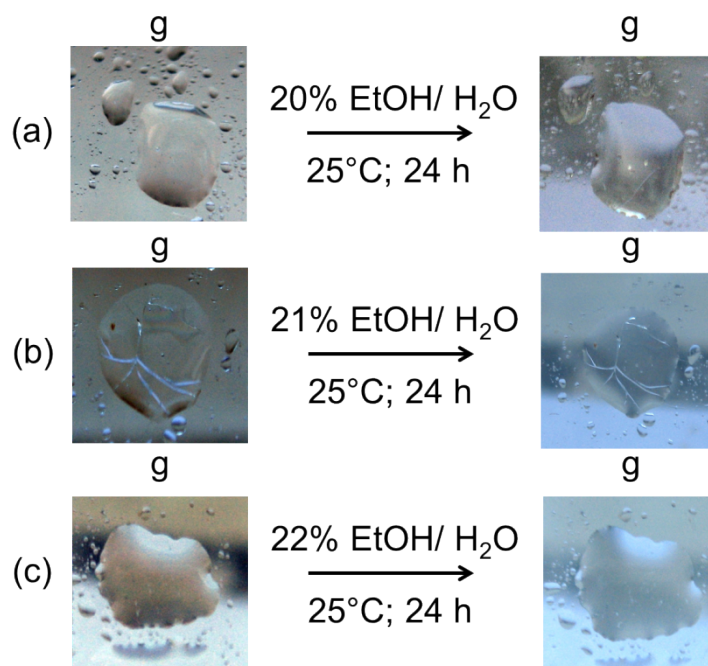

Figure 14S – Visual images of **1g** samples before and after saturation with vapors of binary aqueous mixture having ethanol contents (a) 20 vol. %, (b) 21 vol. %, (c) 22 vol. %; saturation time 24 h,  $T=25^{\circ}\text{C}$ .

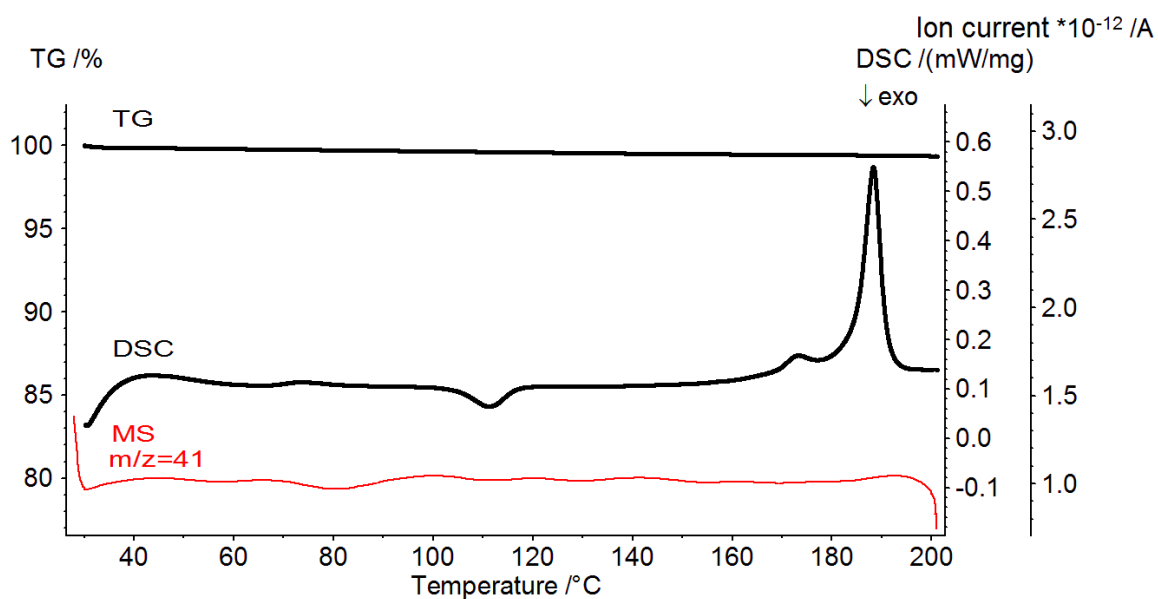

Figure 15S – TG/DSC/MS curves for a sample of  $\beta_0$  phase prepared from clathrate formed by saturation of **1 $\alpha$**  with acetonitrile vapor.

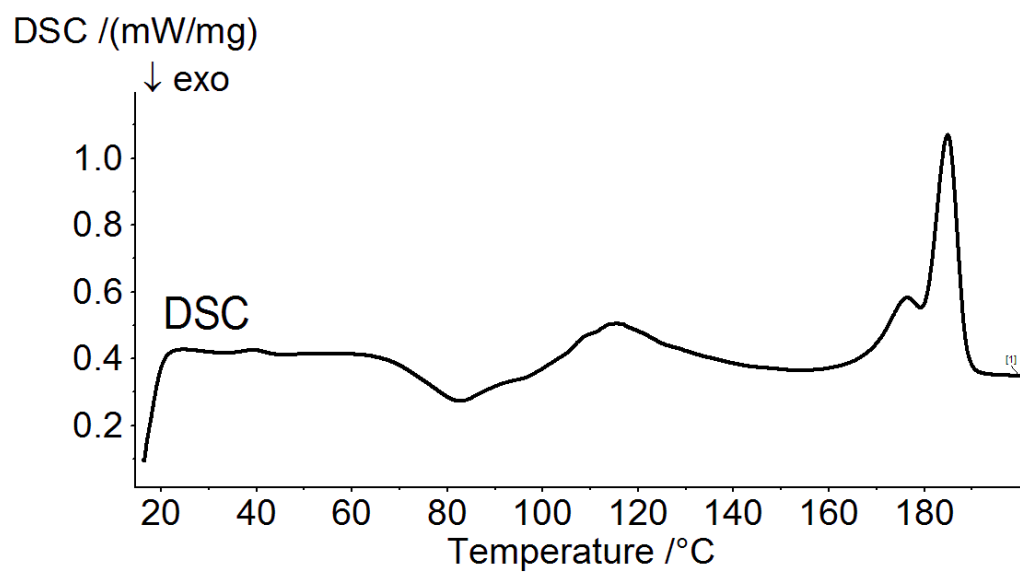

Figure 16S – DSC curve for compact **1g** glass saturated with vapor of liquid aqueous ethanol (25 vol%) for 24 h.

Table 1S. Enthalpies of  $\alpha \rightarrow \alpha'$  transition  $\Delta H_{\alpha \rightarrow \alpha'}$ , fusion  $\Delta H_m$ , and sum of these two values  $\Delta H_\Sigma = \Delta H_{\alpha \rightarrow \alpha'} + \Delta H_m$  for products of **1a** and **1g** saturation with guest vapors from TG/DSC/MS experiment.

| Guest                                         | Host                                                |                          |                               |                                                     |                          |                               |
|-----------------------------------------------|-----------------------------------------------------|--------------------------|-------------------------------|-----------------------------------------------------|--------------------------|-------------------------------|
|                                               | <b>1a</b>                                           |                          |                               | <b>1g</b>                                           |                          |                               |
|                                               | $\Delta H_{\alpha \rightarrow \alpha'}$ ,<br>kJ/mol | $\Delta H_m$ ,<br>kJ/mol | $\Delta H_\Sigma$ ,<br>kJ/mol | $\Delta H_{\alpha \rightarrow \alpha'}$ ,<br>kJ/mol | $\Delta H_m$ ,<br>kJ/mol | $\Delta H_\Sigma$ ,<br>kJ/mol |
| No guest <sup>a</sup>                         | 6                                                   | 46                       | 52                            | 14                                                  | 31                       | 45                            |
| H <sub>2</sub> O                              | 7.2 <sup>b</sup>                                    | 43.5                     | 50.7                          | -                                                   | 34.9                     | 34.9                          |
| CH <sub>3</sub> OH                            | -                                                   | 57.0                     | 57.0                          | -                                                   | 52.2                     | 52.2                          |
| C <sub>2</sub> H <sub>5</sub> OH              | 1.1                                                 | 44.8                     | 45.9                          | 4.6                                                 | 42.2                     | 46.9                          |
| 1-C <sub>3</sub> H <sub>7</sub> OH            | 5.0                                                 | 42.3                     | 47.3                          | 3.0                                                 | 41.5                     | 44.5                          |
| 2-C <sub>3</sub> H <sub>7</sub> OH            | 5.1 <sup>b</sup>                                    | 41.0                     | 46.0                          | 3.0                                                 | 38.6                     | 41.5                          |
| 1-C <sub>4</sub> H <sub>9</sub> OH            | 6.4 <sup>b</sup>                                    | 43.8                     | 50.3                          | 9.2 <sup>b</sup>                                    | 37.1                     | 46.3                          |
| CH <sub>3</sub> CN                            | 3.1 <sup>b</sup>                                    | 42.8                     | 45.9                          | 4.3                                                 | 41.6                     | 45.9                          |
| C <sub>2</sub> H <sub>5</sub> CN              | 3.2 <sup>b</sup>                                    | 44.7                     | 47.9                          | -                                                   | 35.0                     | 35.0                          |
| C <sub>3</sub> H <sub>7</sub> CN              | 4.6                                                 | 41.5                     | 46.0                          | 3.2                                                 | 42.4                     | 45.7                          |
| Acetone                                       | 4.6 <sup>b</sup>                                    | 43.8                     | 48.3                          | 3.8                                                 | 40.1                     | 43.9                          |
| Pyridine <sup>c</sup>                         | 3.9                                                 | 43.1                     | 47.0                          | -                                                   | -                        | -                             |
| C <sub>2</sub> H <sub>4</sub> Cl <sub>2</sub> | 12.7 <sup>b</sup>                                   | 40.9                     | 53.6                          | 15.7 <sup>b</sup>                                   | 38.2                     | 53.9                          |
| CCl <sub>4</sub>                              | 5.3                                                 | 41.7                     | 47.0                          | -                                                   | 40.9                     | 40.9                          |
| CHCl <sub>3</sub> <sup>c</sup>                | 1.1                                                 | 16.4                     | 17.5                          | -                                                   | -                        | -                             |
| Benzene                                       | 3.4 <sup>b</sup>                                    | 41.3                     | 44.7                          | -                                                   | 43.9                     | 43.9                          |
| Toluene                                       | -                                                   | 42.7                     | 42.7                          | -                                                   | 29.5                     | 29.5                          |
| Ethylbenzene                                  | -                                                   | 41.2                     | 41.2                          | 2                                                   | 32.2                     | 34.2                          |
| Cyclohexane                                   | 7.6 <sup>b</sup>                                    | 44.5                     | 52.1                          | 4.8                                                 | 41.8                     | 46.6                          |
| <i>n</i> -Octane                              | 6.4 <sup>b</sup>                                    | 44.5                     | 50.9                          | 4.4                                                 | 39.3                     | 43.8                          |

<sup>a</sup> data for initial **1a** and **1g** samples from TM-DSC experiment; <sup>b</sup> a separate peak of  $\alpha \rightarrow \alpha'$  transition is observed, in other cases  $\Delta H_{\alpha \rightarrow \alpha'}$  values are for shoulders of fusion peak where observed; <sup>c</sup> data for inclusion compounds from dried **1a** solution in liquid guest formed in vapor sorption process. The values of  $\Delta H_\Sigma$  are determined with the error of  $\pm 1$  kJ/mol.
